# Supplementary material
Source: HighWire-hosted journal article supplement (https://jcptest-stage.highwire.org/content/75/5/324)
Supplement: inline-supplementary-material-2 [file inline-supplementary-material-2.pdf]

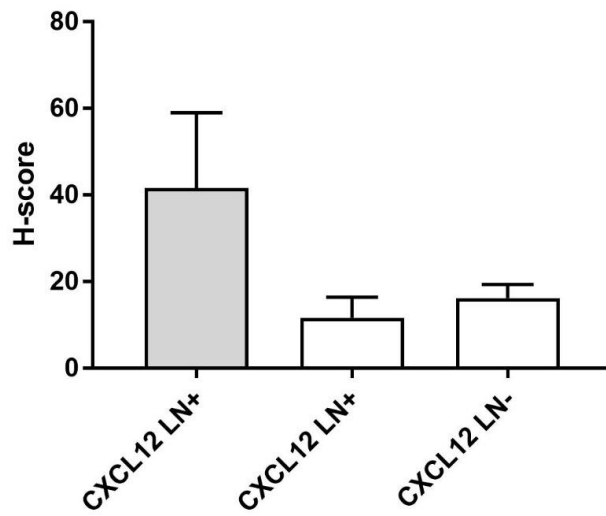

**Supplemental figure 2** CXCL12 histoscore (H-score) assessment results for metastatic cells (grey column) and lymphocytes (white columns) in the involved lymph nodes (LN+, n=5) and metastasis-free lymph nodes (LN-, n=27) of VSCC patients.
